# Supplementary material for: Analytical scaling relations to evaluate leakage and intrusion in intermittent water supply systems
Source: PLOS journal article supplement (doi:10.1371/journal.pone.0196887), 2018-05-18
Supplement: S3 (10.1371/journal.pone.0196887.s003) [file journal.pone.0196887.s003]

## S3 Text for: “Analytical scaling relations to evaluate leakage and intrusion in intermittent water supply systems”

### Varanasi

Required reduction in EOA is given by Eq 11. Varanasi reported  $N = 0.3$ ,  $H^0 = 3$ , &  $t^0 = 7$ . The target system goals are  $t^* = 23.75$  and  $H^* = 17$ . Therefore, Varanasi’s required reduction in EOA is:

$$\begin{aligned}\frac{A^*}{A^0} &= \min \left[ 1, \frac{t^0}{t^*} \left( \frac{H^0}{H^*} \right)^\alpha \left( \frac{w}{pN} + 1 \right) \right] \\ &= \min \left[ 1, \frac{7}{23.75} \left( \frac{3}{17} \right)^1 \left( \frac{w}{p0.3} + 1 \right) \right]\end{aligned}$$

for Scenario i),  $\frac{w}{p} = 0.3$  :

$$\begin{aligned}\therefore \frac{A^*}{A^0} &= \min \left[ 1, \frac{7}{23.75} \left( \frac{3}{17} \right)^1 \left( \frac{0.3}{0.3} + 1 \right) \right] \\ &= 0.104 = 90\% \text{decrease}\end{aligned}\tag{S8}$$

for Scenario ii),  $\frac{w}{p} = 0.02$  :

$$\begin{aligned}\therefore \frac{A^*}{A^0} &= \min \left[ 1, \frac{7}{23.75} \left( \frac{3}{17} \right)^1 \left( \frac{0.02}{0.3} + 1 \right) \right] \\ &= 0.055 = 94\% \text{decrease}\end{aligned}\tag{S9}$$

### Dar es Salaam

LR in the intruded volume in the steady-state phase due to increased supply duration and EOA reduction is given by Eq 15. Dar es Salaam reported  $N = 0.56$  and  $t^0 = 8$ . The target system goal is  $t^* = 23.75$ . Therefore, Dar es

Salaam's LR during steady state is:

$$\begin{aligned} LR &= -\log_{10}\left(\frac{V_C^*}{V_C^0}\right)_{H^*=H^0} = -\log_{10}\left[\frac{t^*}{t^0} \min\left[1, \left(\frac{t^0}{t^*}\right) \left(\frac{w}{pN} + 1\right)\right]\right] \\ &= -\log_{10}\left(\frac{t^*}{t^0}\right) + \min\left[0, -\log_{10}\left[\left(\frac{t^0}{t^*}\right) \left(\frac{w}{pN} + 1\right)\right]\right] \end{aligned}$$

for Scenario i),  $\frac{w}{p} = 0.3$  :

$$\begin{aligned} \therefore LR &= -\log_{10}\left(\frac{23.75}{8}\right) + \min\left[0, -\log_{10}\left[\left(\frac{8}{23.75}\right) \left(\frac{0.3}{0.56} + 1\right)\right]\right] \\ &= -0.47 + 0.29 = -0.18 \end{aligned} \tag{S10}$$

for Scenario ii),  $\frac{w}{p} = 0.02$  :

$$\begin{aligned} \therefore LR &= -\log_{10}\left(\frac{23.75}{8}\right) + \min\left[0, -\log_{10}\left[\left(\frac{8}{23.75}\right) \left(\frac{0.02}{0.56} + 1\right)\right]\right] \\ &= -0.47 + 0.46 = -0.01 \end{aligned} \tag{S11}$$
